# Supplementary material for: S/N/O-Enriched Carbons from Polyacrylonitrile-Based Block Copolymers for Selective Separation of Gas Streams
Source: MDPI journal article supplement (doi:10.3390/polym16020269), 2024-01-18
Supplement: s1 [file s1]

# S/N/O-Enriched Carbons from Polyacrylonitrile-Based Block Copolymers for Selective Separation of Gas Streams

Diego Gómez-Díaz <sup>1,\*</sup>, Lidia Domínguez-Ramos <sup>1,2,3</sup>, Giulio Malucelli <sup>4</sup>, María Sonia Freire <sup>1</sup>, Julia González-Álvarez <sup>1</sup> and Massimo Lazzari <sup>2,3,\*</sup>

<sup>1</sup> Departamento de Ingeniería Química, ETSE, Universidade de Santiago de Compostela, Rua Lope Gómez de Marzoa s/n, 15782 Santiago de Compostela, Spain; lidia.dominguez2@usc.es (L.D.-R.); mariasonia.freire@usc.es (M.S.F.); julia.gonzalez@usc.es (J.G.-Á.)

<sup>2</sup> Departamento de Química Física, Facultade de Química, Universidade de Santiago de Compostela, Avenida das Ciencias s/n, 15782 Santiago de Compostela, Spain

<sup>3</sup> Centro Singular de Investigación en Química Biolóxica e Materiais Moleculares (CiQUS), Universidade de Santiago de Compostela, 15782 Santiago de Compostela, Spain

<sup>4</sup> Department of Applied Science and Technology, Politecnico di Torino, Viale Teresa Michel 5, 15121 Alessandria, Italy; giulio.malucelli@polito.it

\* Correspondence: diego.gomez@usc.es (D.G.-D.); massimo.lazzari@usc.es (M.L.)

**Supplementary Materials:** Scheme S1. Schematic illustration of the formation of graphitic carbon from a PAN-based BC precursor; Scheme S2. Possible positions of sulfur incorporated into the graphitic carbon network; Figure S1. Raman spectra of BC10/90-O (solid line) and BC10/90-S (dashed line) in the 900–1900 cm<sup>-1</sup> range. Figure S2. Pore size distribution of BC10/90-O and BC10/90-S.

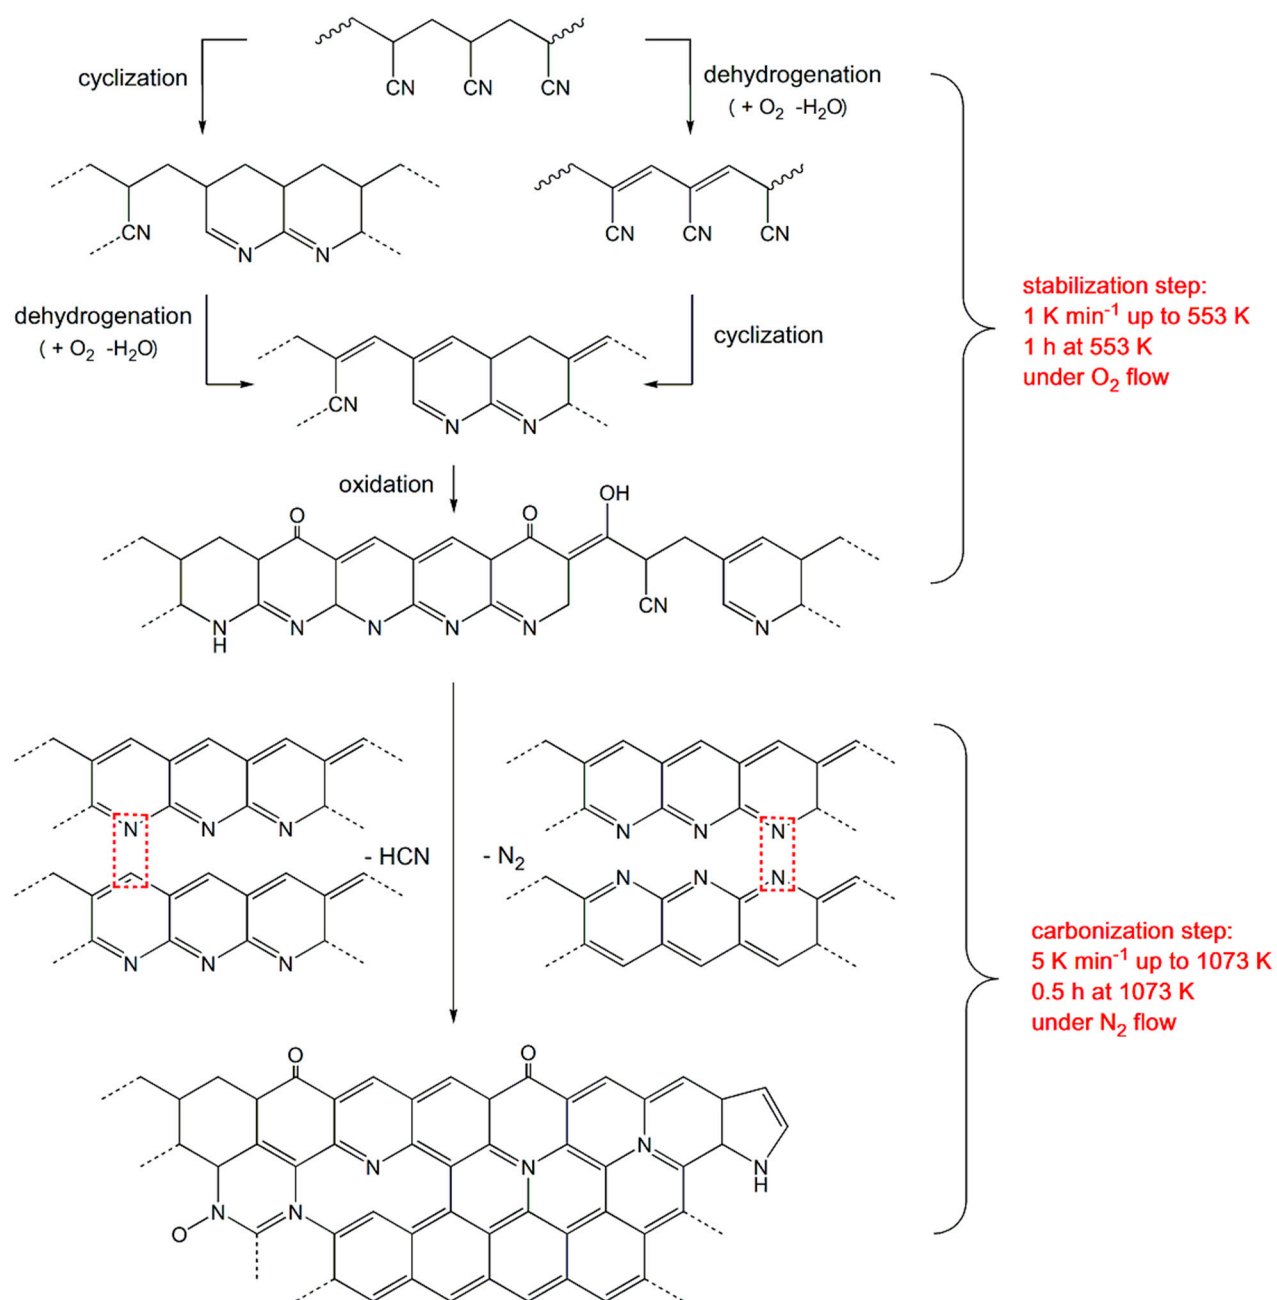

**Scheme S1.** Schematic illustration of the formation of graphitic carbon from a PAN-based BC precursor, also including the information resulting from XPS measurements (see examples in Figure 2 and corresponding discussion). PMMA decomposition is not reported, as it essentially consists of volatilization by unzipping. Adapted from: Fitzer, E. *Carbon* **1989**, 27, 621–645.

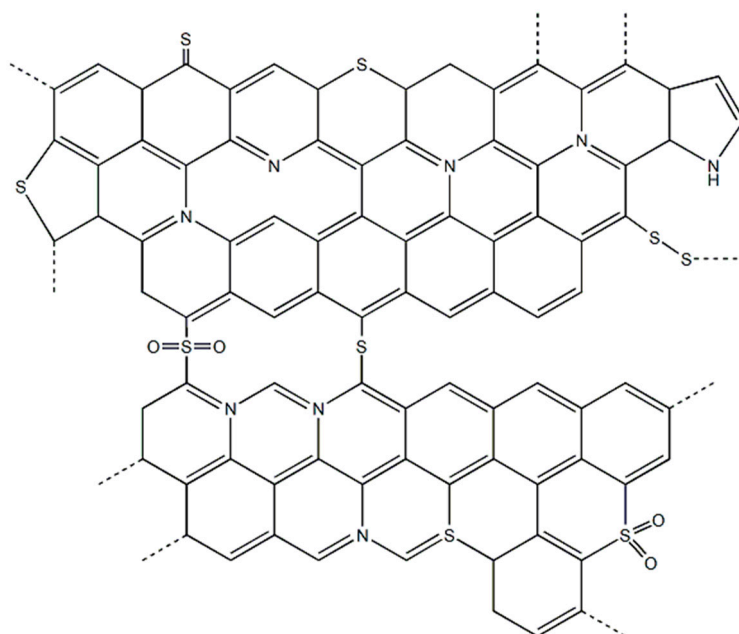

**Scheme S2.** Tentative positions of sulphur incorporated into the graphitic carbon network, taking into account the information resulting from XPS measurements (see examples in Figure 2 and corresponding discussion). Adapted from: Kiciński, W.; Szala, M.; Bystrzejewski, M. *Carbon N. Y.* **2014**, 68, 1–32.

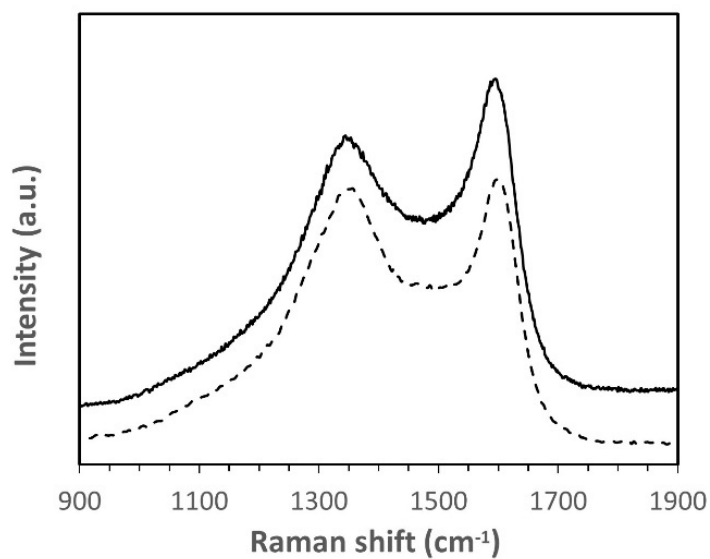

**Figure S1.** Raman spectra of BC10/90-O (solid line) and BC10/90-S (dashed line) in the 900-1900  $\text{cm}^{-1}$  range.

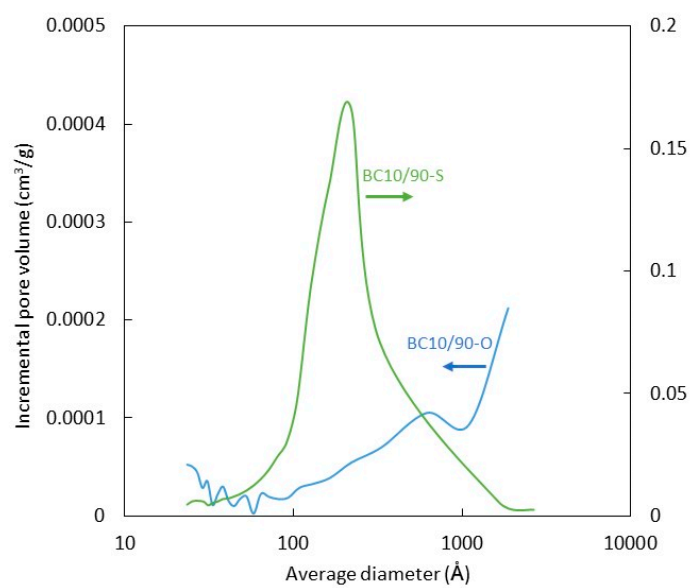

**Figure S2.** Pore size distribution of BC10/90-O and BC10/90-S.
